# Supplementary material for: Whole exome sequencing uncovered highly penetrant recessive mutations for a spectrum of rare genetic pediatric diseases in Bangladesh
Source: PubMed Central journal article supplement (PMC7887195; doi:10.1038/s41525-021-00173-0), 2021-02-16
Supplement: 41525_2021_173_MOESM1_ESM.pdf [file 41525_2021_173_MOESM1_ESM.pdf]

**Supplementary Information: Whole exome sequencing uncovered highly penetrant recessive mutations for a spectrum of rare genetic pediatric diseases in Bangladesh**

**Supplementary Table 1: Biospecimen Description (DNA)**

| Case ID | Gender | Conc in ng/μl | 260/280 ratio | 260/230 ratio |
|---------|--------|---------------|---------------|---------------|
| 1       | Female | 49.75         | 1.83          | 2.09          |
| 2       | Female | 209.8         | 1.90          | 2.28          |
| 3       | Male   | 117.55        | 1.91          | 2.3           |
| 4       | Male   | 104.4         | 1.89          | 2.11          |
| 5       | Male   | 142.2         | 1.92          | 2.4           |

**Supplementary Table 2: Details of Sanger sequencing validation primers**

| Case ID | FP Id.                    | FP Sequence                 | RP Id.                    | RP Sequence                | Product Size |
|---------|---------------------------|-----------------------------|---------------------------|----------------------------|--------------|
| 1.      | DHH_pP288R_F              | CGAGAGTACCAA<br>TGCATGCC    | DHH_pP288R_R              | GCTTCATTTGTG<br>GCTGTGGA   | 700          |
| 2.      | GNPTAB_pK<br>1168Qfs*5_F  | AAGAATCATTGT<br>ACCCAGGAG   | GNPTAB_pK<br>1168Qfs*5_R  | ATAGAATATCA<br>TTCCCCCAGAG | 529          |
|         | GNPTAB_pM<br>1168Ifs*25_F | AGACTAGCTATG<br>AATACCCACAG | GNPTAB_pM<br>1168Ifs*25_R | ACTAAGGCTAC<br>TTGAAATGTGC | 849          |
| 3.      | BBS1_pA447T_F             | GCAGATTGTTTG<br>GGGAAGAA    | BBS1_pA447T_R             | TGGATTTGCAG<br>AGGTGAGTG   | 381          |
| 4.      | SURF1_pG77R_F             | GTTGAACTCAAG<br>TAAAACAGGC  | SURF1_pG77R_R             | GAGCCCTAGAT<br>CCCCTTAC    | 557          |
|         | SURF1_pR264<br>Sfs*27_F   | CCAGGATTTTAT<br>GATGAACCAG  | SURF1_pR264<br>Sfs*27_R   | GAATACTGTCCT<br>TCCTCCTAAC | 629          |
| 5.      | AP4B1_pR238X_F            | GGTGGCAATCAA<br>TTCGAAGA    | AP4B1_pR238X_R            | CACACCTCCAA<br>AACCATT     | 359          |

**Supplementary Table 3: PCR Condition**

| <b>Temperature</b> | <b>Time</b> | <b>Cycles</b> |
|--------------------|-------------|---------------|
| 95 °C              | 5 min       |               |
| 95 °C              | 30 sec      | 35            |
| 60 °C              | 30 sec      |               |
| 72 °C              | 1 min       |               |
| 72 °C              | 7 min       |               |
| 4 °C               | storage     |               |
